# Supplementary material
Source: PubMed Central journal article supplement (PMC6388712)
Supplement: Supp_Fig1.pdf [file Supp_Fig1.pdf]

## Supplementary Data

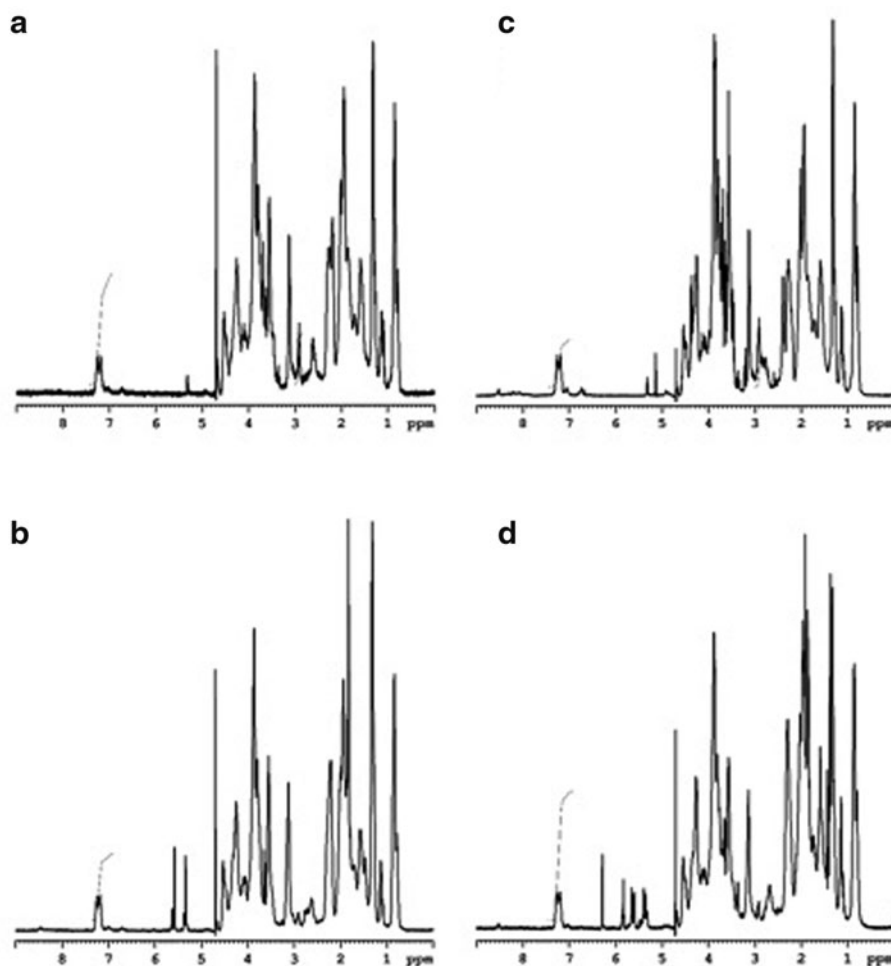

**SUPPLEMENTARY FIG. S1.**  $^1\text{H-NMR}$  spectra of digested fetal cartilage before (a) and after methacrylation (b). NMR spectra of digested adult cartilage before (c) and after methacrylation (d).  $^1\text{H-NMR}$ , hydrogen-1 proton nuclear magnetic resonance.
