# Supplementary material
Source: PubMed Central journal article supplement (PMC6388712)
Supplement: Supp_Fig2.pdf [file Supp_Fig2.pdf]

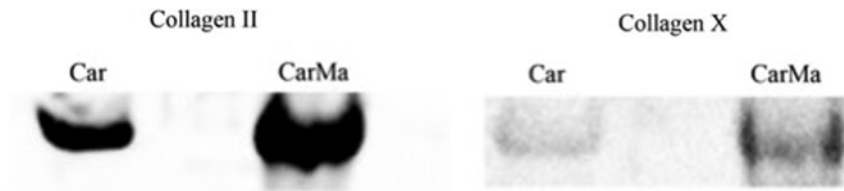

**SUPPLEMENTARY FIG. S2.** Western blot bands of Col II and Col X for digested fetal cartilage before (Car) and after methacrylation (CarMa).
