# Supplementary material
Source: PubMed Central journal article supplement (PMC6388712)
Supplement: Supp_Fig3.pdf [file Supp_Fig3.pdf]

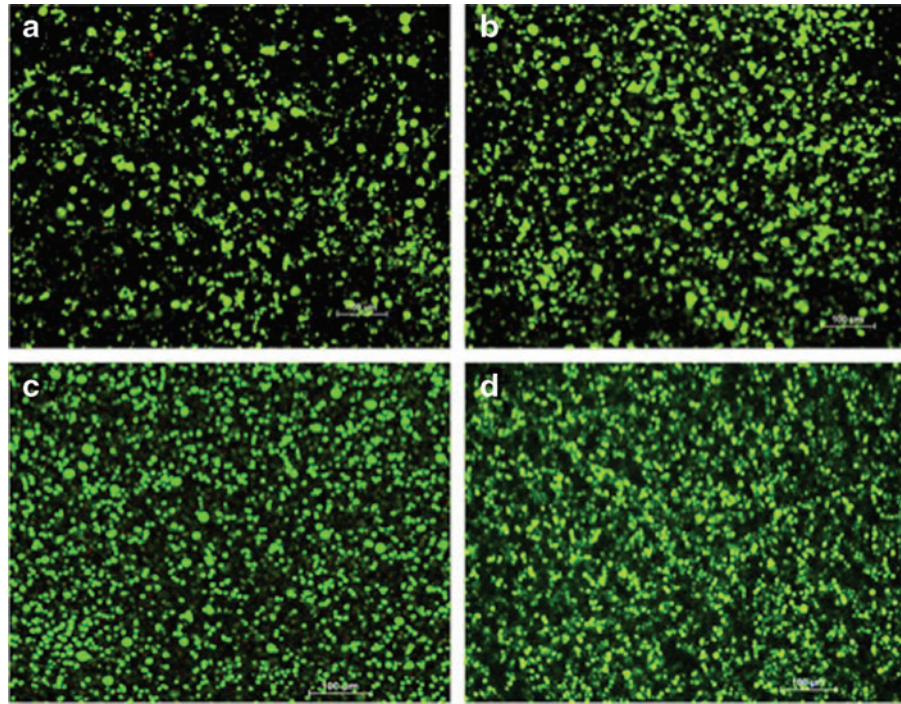

**SUPPLEMENTARY FIG. S3.** Calcein AM (live, *green*) and ethidium homodimer (dead, *red*) staining of the hMSCs encapsulated in fetal CarMa hydrogel at 25 (a), 60 (b), 100 (c), and 200 (d) (million cells/mL) cell density. hMSC, human mesenchymal stem cell.
